# Supplementary material for: Osteology of a forelimb of an aetosaur Stagonolepis olenkae (Archosauria: Pseudosuchia: Aetosauria) from the Krasiejów locality in Poland and its probable adaptations for a scratch-digging behavior
Source: PeerJ journal article supplement (doi:10.7717/peerj.5595), 2018-10-02
Supplement: Supplementary_Figure_2_pop.pdf [file Supplementary_Figure_2_pop.pdf]

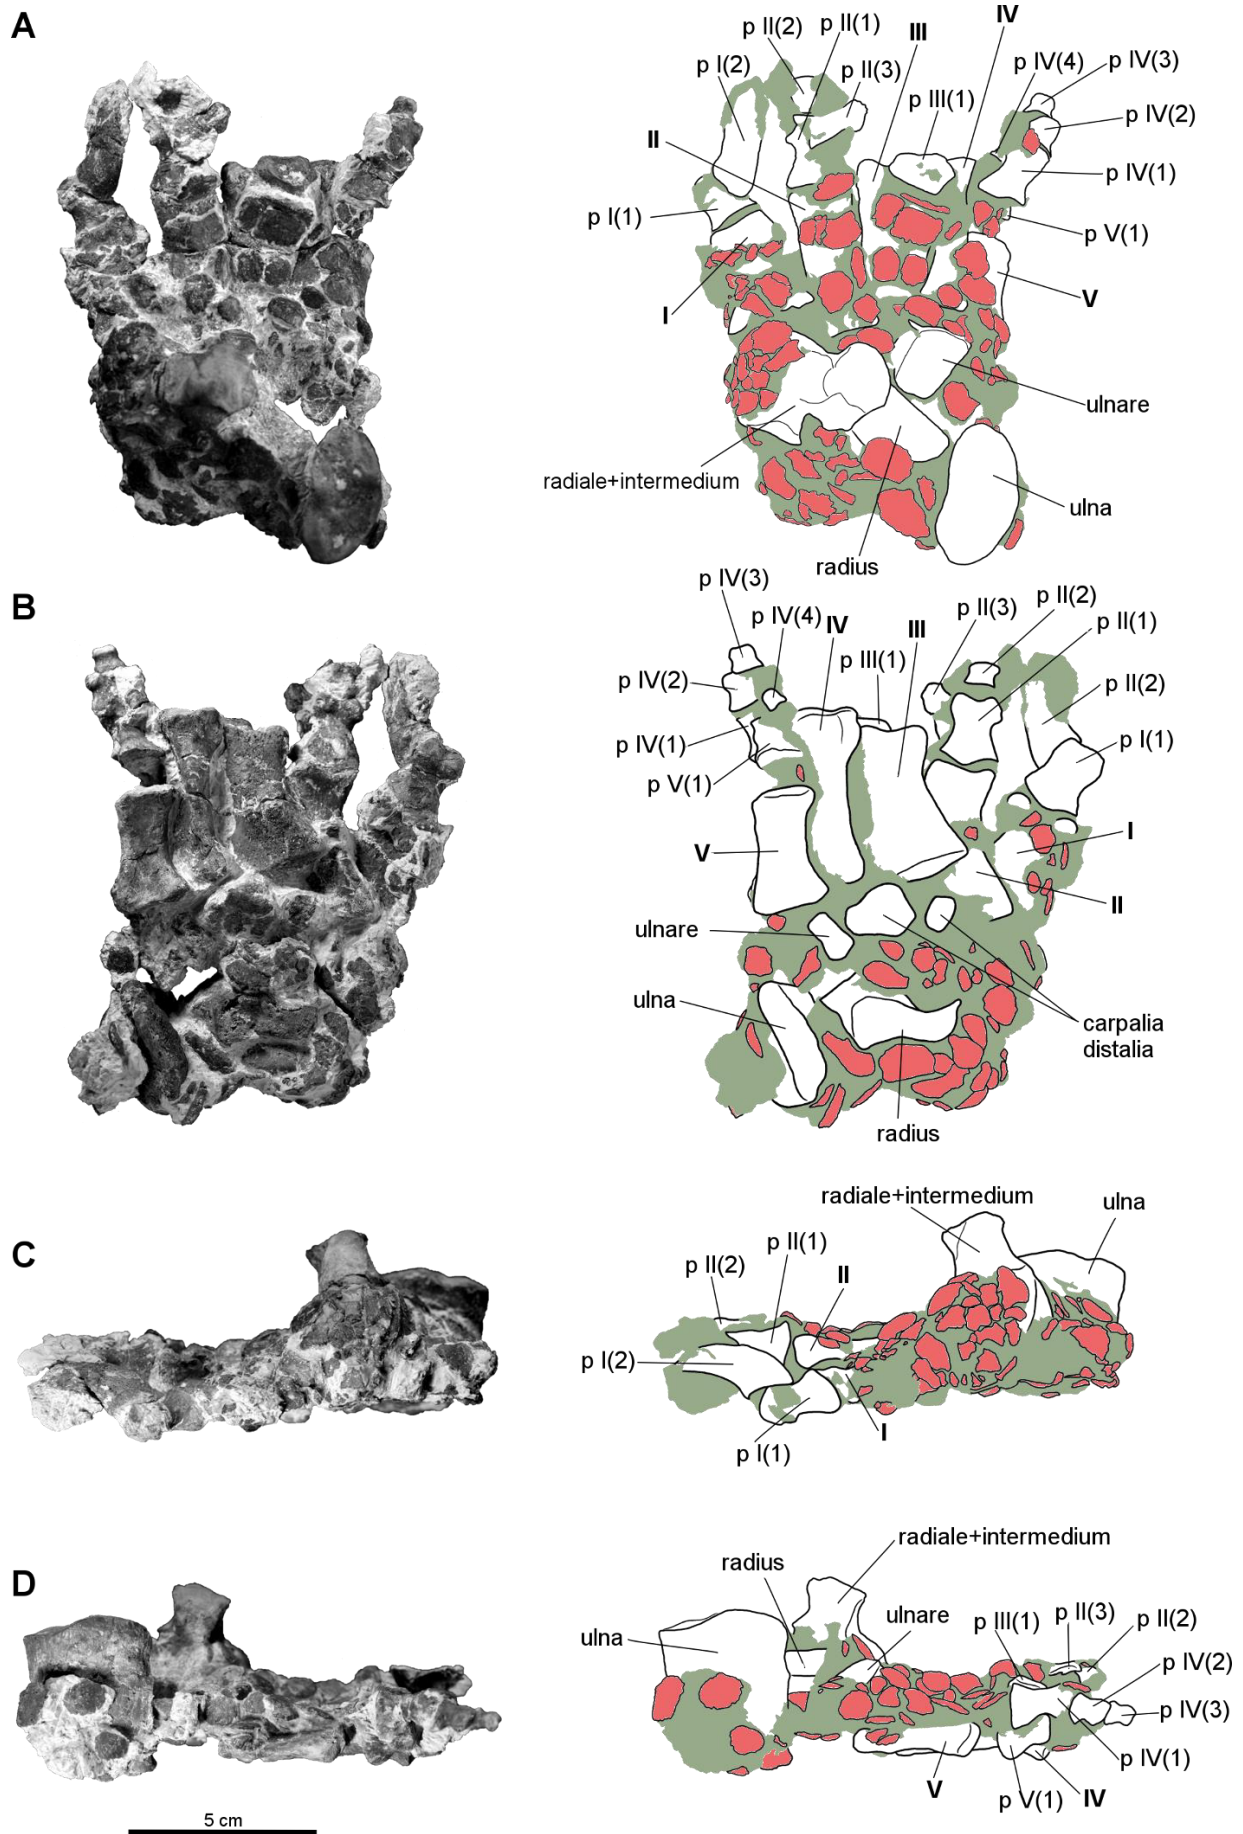

**Supplementary Figure 2.** Right manus and part of the forearm of the aetosaur *Stagonolepis olenkae*, Sulej 2010, ZPAL AbIII/3349/1. Photograph and schematic drawing of the specimen with the metacarpals and phalanges exposed in dorsal (A), ventral (B), medial (C) and lateral view (D). In the schematic drawings osteoderms are marked red and the sediment is marked grey. All photographs and drawings are in the same scale.
