# Supplementary material for: Osteology of a forelimb of an aetosaur Stagonolepis olenkae (Archosauria: Pseudosuchia: Aetosauria) from the Krasiejów locality in Poland and its probable adaptations for a scratch-digging behavior
Source: PeerJ journal article supplement (doi:10.7717/peerj.5595), 2018-10-02
Supplement: Supplementary_Figure_5.pdf [file Supplementary_Figure_5.pdf]

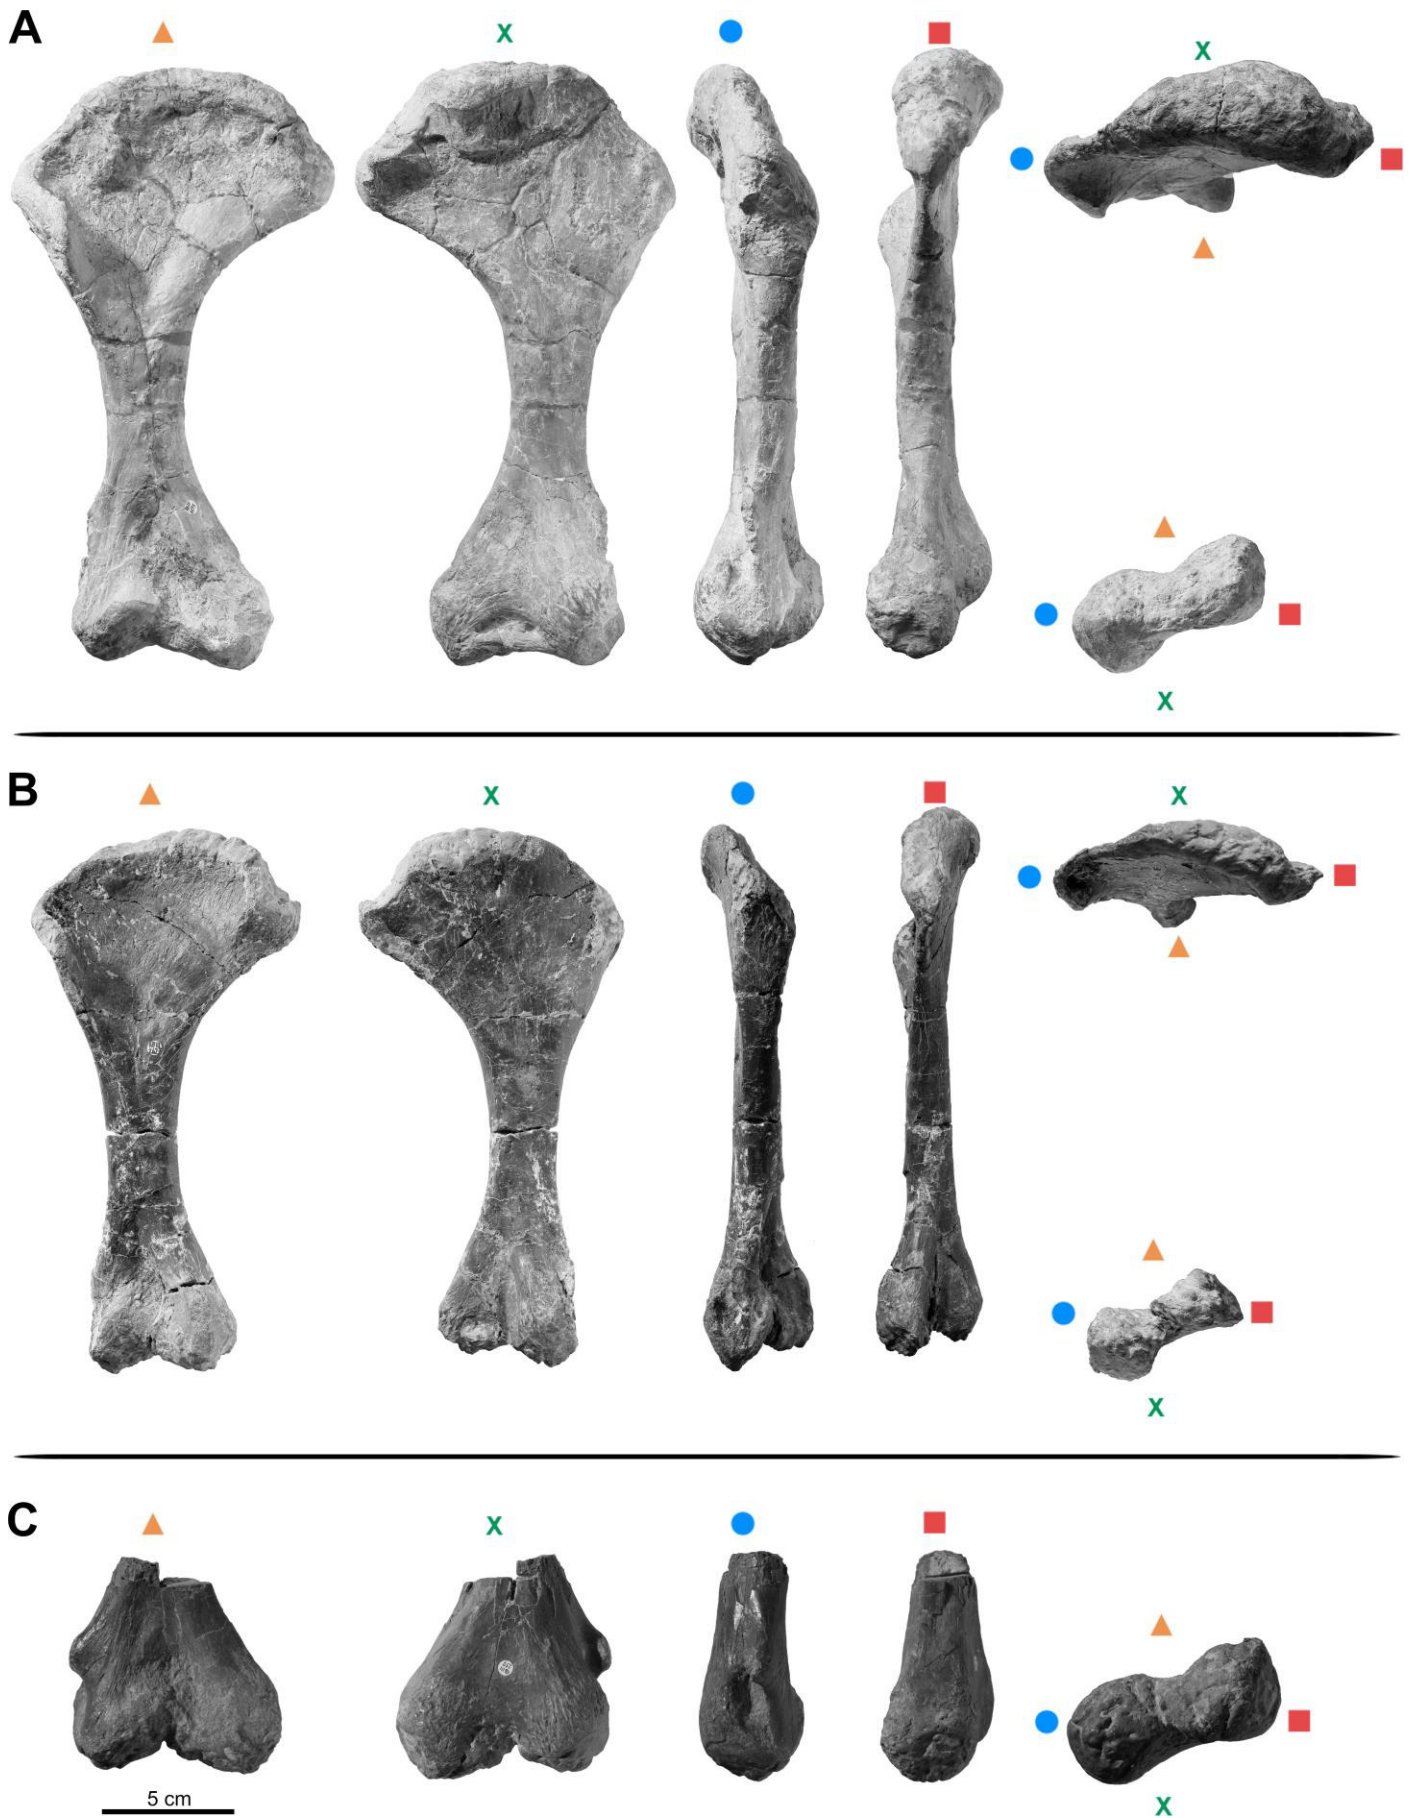

**Supplementary Figure 5.** Isolated humeri of the aetosaur *Stagonolepis olenkae*, Sulej 2010. Photographs of the right humerus ZPAL AbIII/1175 (A); of the right humerus ZPAL AbIII/2627 (B); of the distal part of the right humerus ZPAL AbIII/257 (C). Symbols attached to pictures show which surface is exposed in the photograph, with (X) for the dorsal, (▲) for the ventral, (■) for the medial, and (●) for the lateral, and how the surfaces are oriented in proximal and distal view. All photographs are in the same scale.
