# Supplementary material for: Osteology of a forelimb of an aetosaur Stagonolepis olenkae (Archosauria: Pseudosuchia: Aetosauria) from the Krasiejów locality in Poland and its probable adaptations for a scratch-digging behavior
Source: PeerJ journal article supplement (doi:10.7717/peerj.5595), 2018-10-02
Supplement: Supplementary_Figure_8.pdf [file Supplementary_Figure_8.pdf]

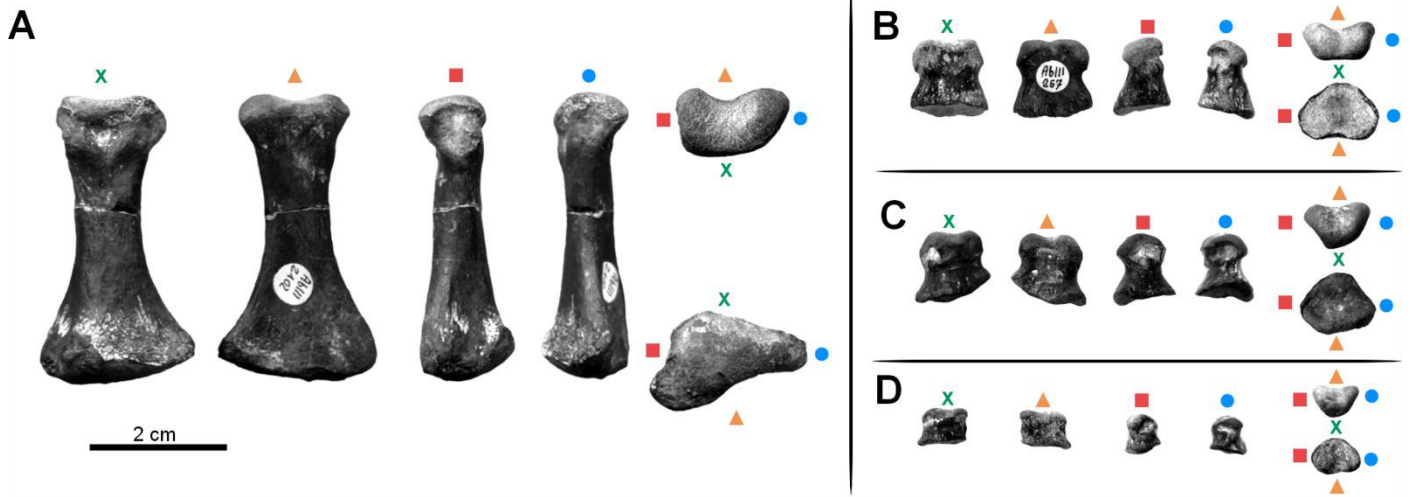

**Supplementary Figure 8.** Isolated elements of manus of the aetosaur *Stagonolepis olenkae*, Sulej 2010. **(A)** the right metacarpal of the digit IV, ZPAL AbIII/2102; **(B)** the second phalanx of the digit III of a left manus, ZPAL AbIII/267. **(C)** the second phalanx of the digit II of a right manus, ZPAL AbIII/3352. **(D)** the third phalanx of the digit III of a left manus, ZPAL AbIII/3353. Symbols attached to pictures show which surface is exposed in the photograph, with (X) for the dorsal, (▲) for the ventral, (■) for the medial, and (●) for the lateral, and how the surfaces are oriented in proximal and distal view. All photographs are in the same scale.
