# Supplementary material for: Osteology of a forelimb of an aetosaur Stagonolepis olenkae (Archosauria: Pseudosuchia: Aetosauria) from the Krasiejów locality in Poland and its probable adaptations for a scratch-digging behavior
Source: PeerJ journal article supplement (doi:10.7717/peerj.5595), 2018-10-02
Supplement: Supplementary_Figure_9.PDF [file Supplementary_Figure_9.PDF]

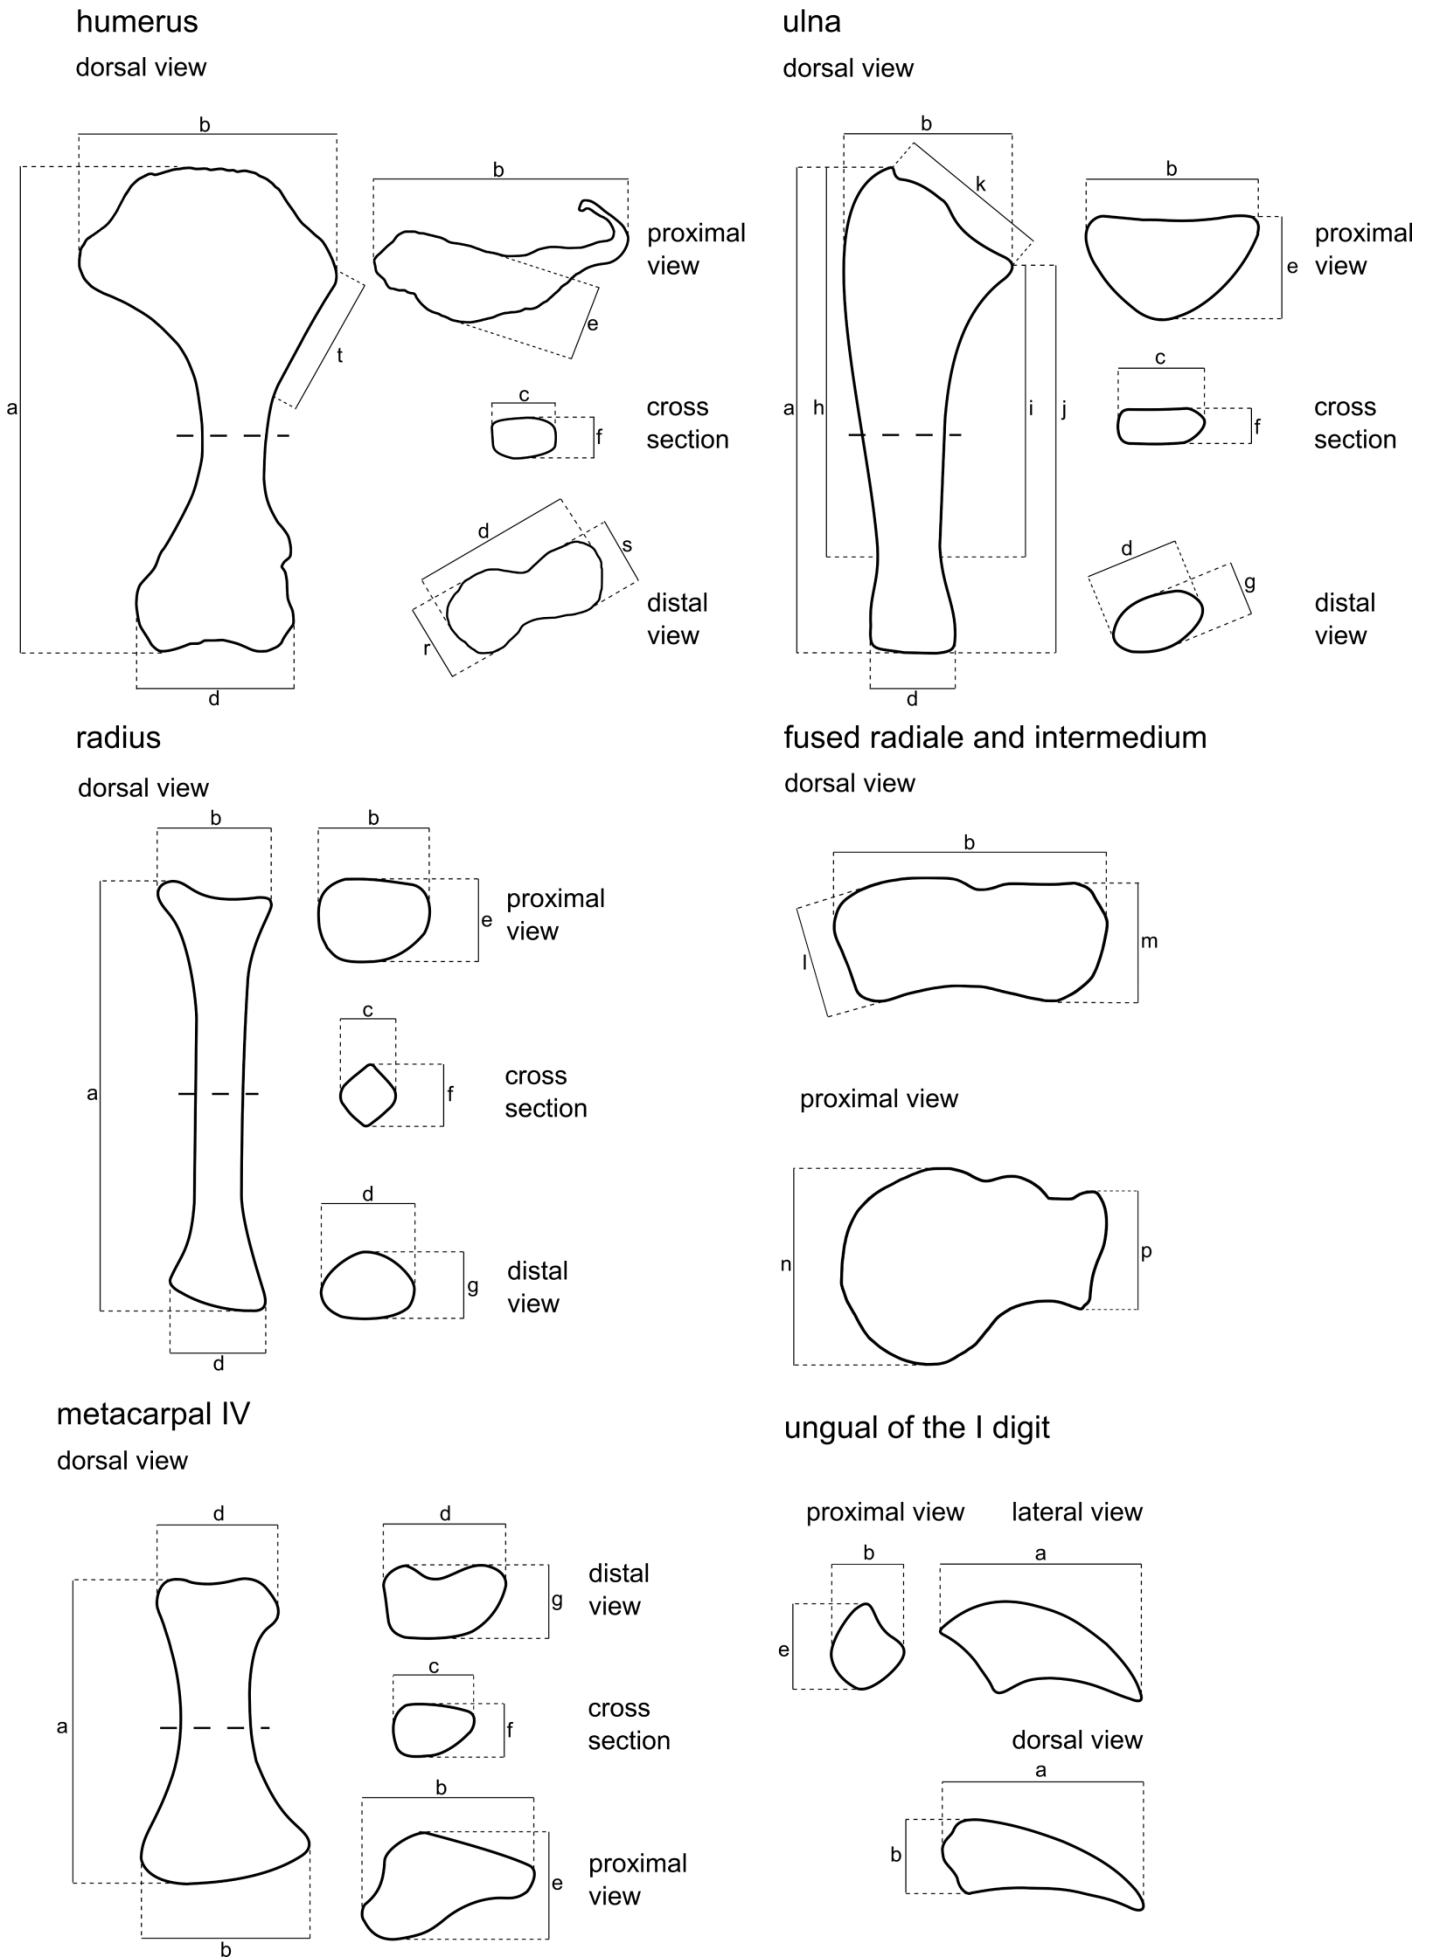

**Supplementary Figure 9.** Schematic drawings of the forelimbs bones of the *Stagonsolepis olenkae* from Krasiejów locality in Poland, showing how the measurements of the bones were taken.
